# Supplementary material for: Extending the π-electron conjugation in 2D planar graphitic carbon nitride: efficient charge separation for overall water splitting
Source: Royal Society of Chemistry journal article supplement (doi:10.1039/c8ta10580d), 2019-01-01
Supplement: c8ta10580d1.pdf [file c8ta10580d1.pdf]

**Extending the  $\pi$ -electron conjugation in 2D planar graphitic carbon nitride:  
Efficient charge separation for overall water splitting**

Sankeerthana Bellamkonda, Ramasamy Shanmugam, and G. Ranga Rao\*

Department of Chemistry and DST-IITM Solar Energy Harnessing Centre (DSEHC), Indian  
Institute of Technology Madras, Chennai 600036, India

---

\*Corresponding author; Tel.: +91 44 2257 4226; Fax: +91 44 2257 4202; E-mail address:

[grrao@iitm.ac.in](mailto:grrao@iitm.ac.in) (G. Ranga Rao).

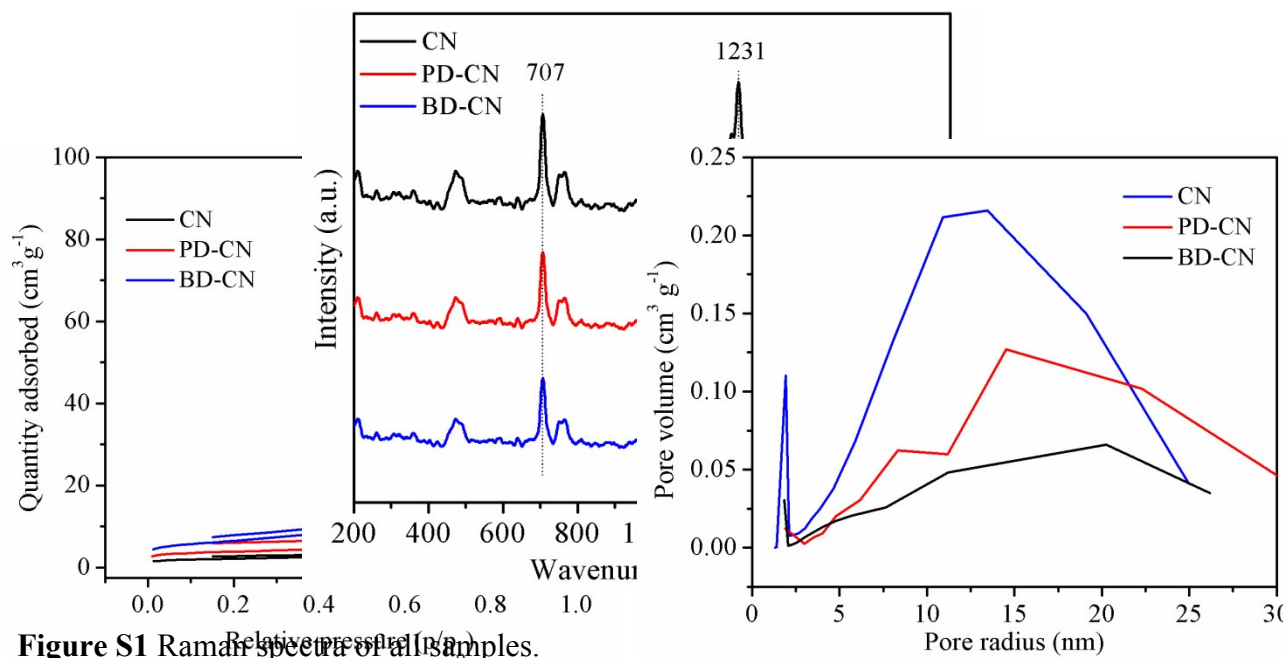

**Figure S1** Raman spectra of all samples.

**Figure S2** N<sub>2</sub> adsorption-desorption isotherms of as-synthesized carbon nitride polymer samples.

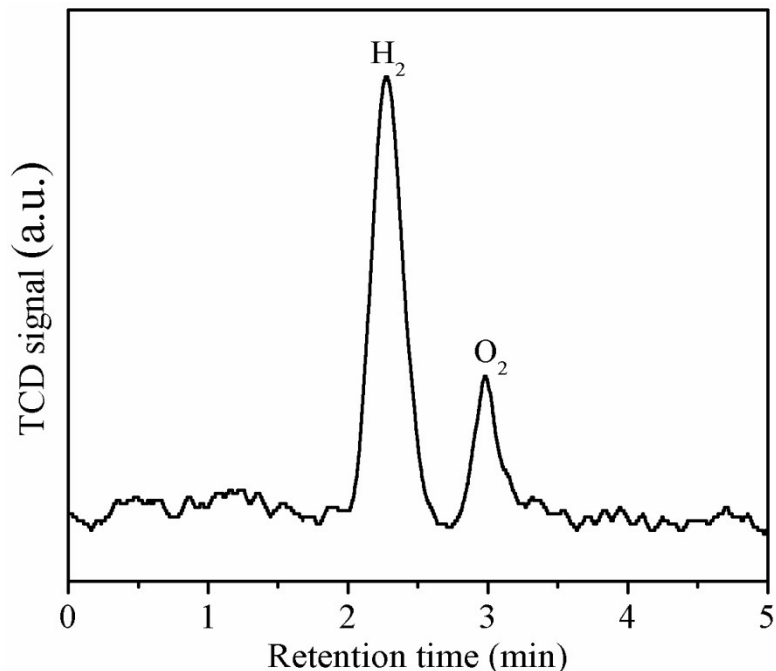

**Figure S3** GC signal for photocatalytic activity of BD-CN polymer after 1 h light illumination

The absence of N<sub>2</sub> peak and the evolution of stoichiometric ratio of ~ 2:1 H<sub>2</sub> and O<sub>2</sub> gases evidently assures that the observed O<sub>2</sub> gas exactly comes from photocatalytic water splitting by BD-CN polymer sample rather than leakage air. Moreover, the unnoticeable N<sub>2</sub> gas peak even with increase in irradiation time exhibits the absence of photocorrosion during photocatalytic reaction, indicating super photocatalytic stability of BD-CN.

Even after recyclability tests for photocatalytic water splitting, the BD-CN polymer sample maintained its structural and morphological features as shown in Figures S4-S7 and Table S1. This demonstrates the high stability of BD-CN photocatalytic material.

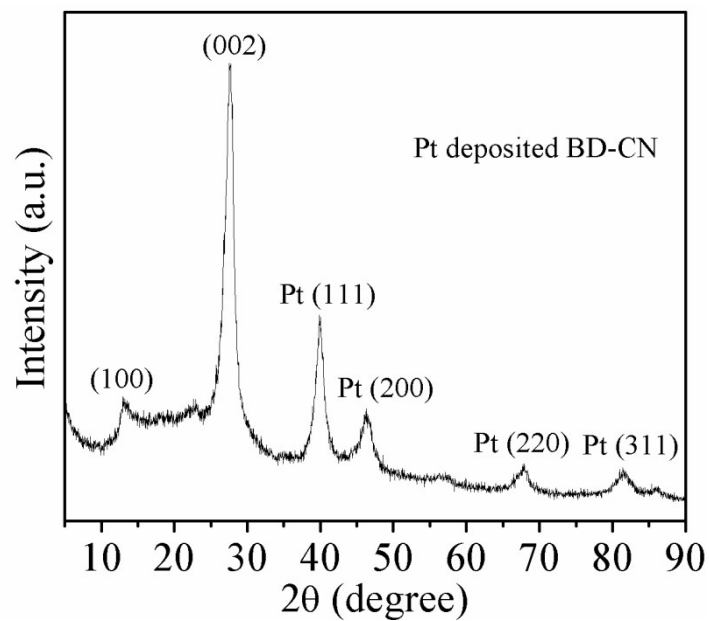

**Figure S4** XRD profile of Pt photodeposited BD-CN catalyst after photocatalytic tests

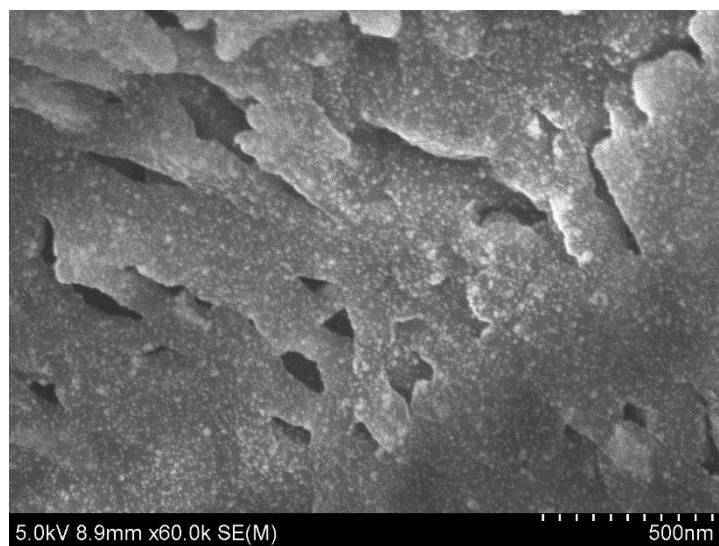

**Figure S5** FESEM image of Pt deposited BD-CN photocatalyst after photocatalytic measurements

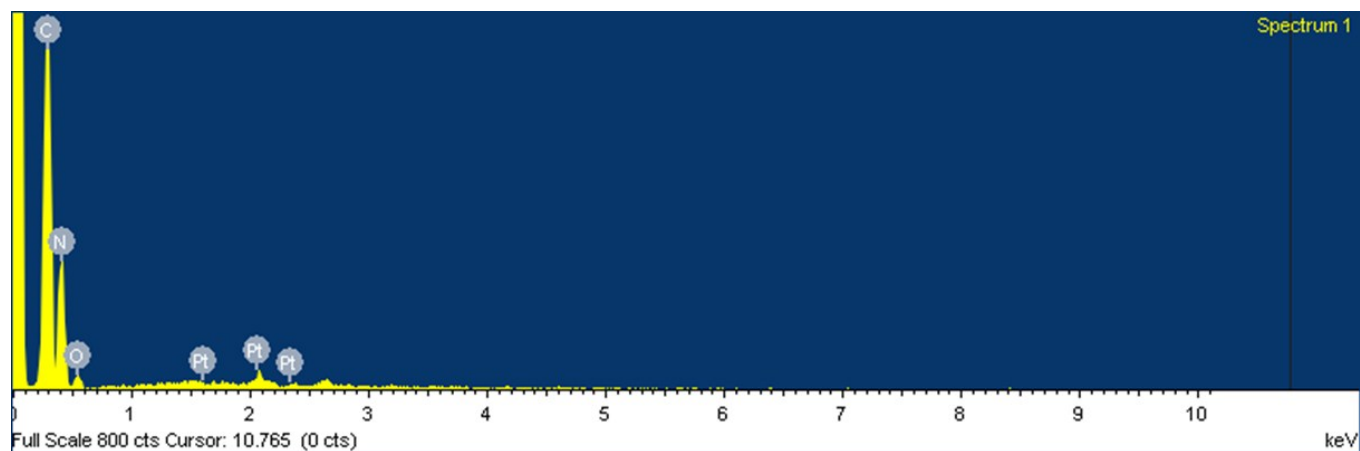

**Figure S6** EDAX of Pt deposited BD-CN photocatalyst after stability tests.

**Table S1** Elemental composition of Pt deposited BD-CN by FESEM analysis

| Element | App<br>Conc. | Intensity<br>Corn. | Weight<br>% | Weight<br>%<br>Sigma | Atomic<br>% |
|---------|--------------|--------------------|-------------|----------------------|-------------|
| C K     | 4.05         | 1.5350             | 34.41       | 1.29                 | 38.76       |
| N K     | 0.89         | 0.1993             | 57.96       | 1.55                 | 55.99       |
| O K     | 0.14         | 0.3041             | 6.08        | 1.00                 | 5.14        |
| Pt M    | 0.09         | 0.7442             | 1.55        | 0.41                 | 0.11        |
| Totals  |              |                    | 100.00      |                      |             |

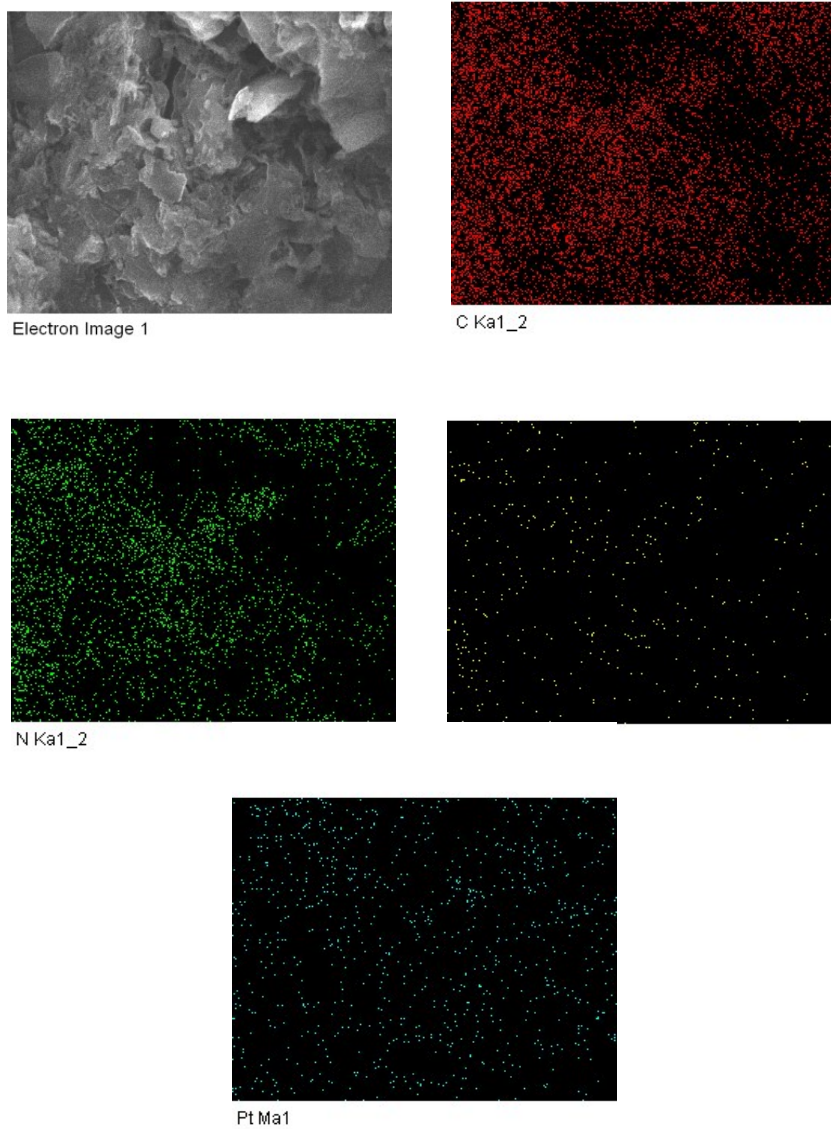

**Figure S7** Elemental mapping of Pt deposited BD-CN photocatalyst after stability studies.

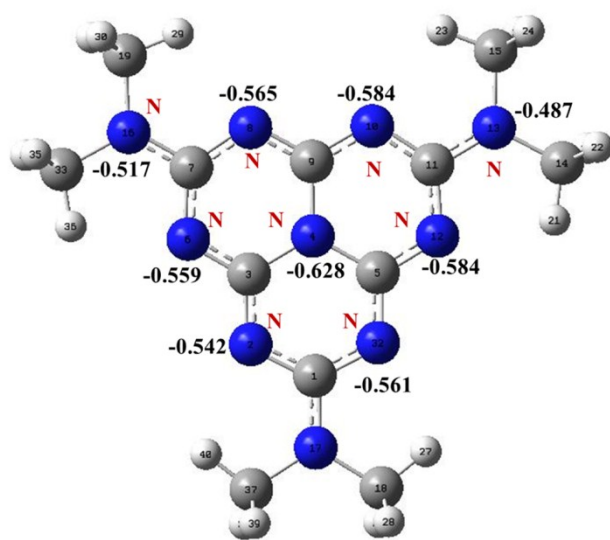

CN

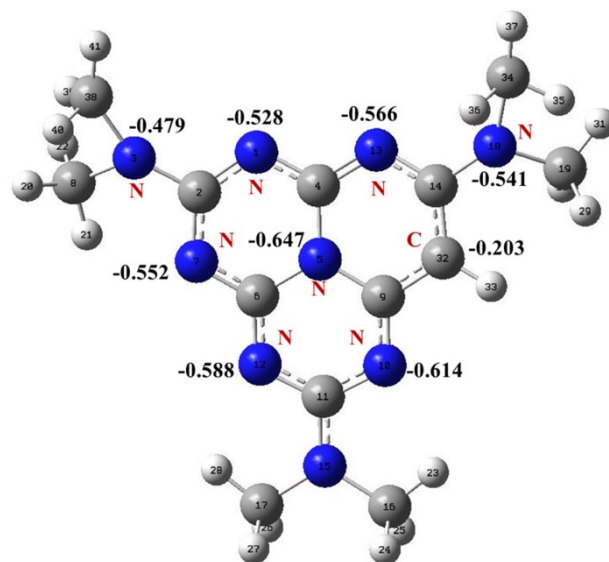

PD-CN

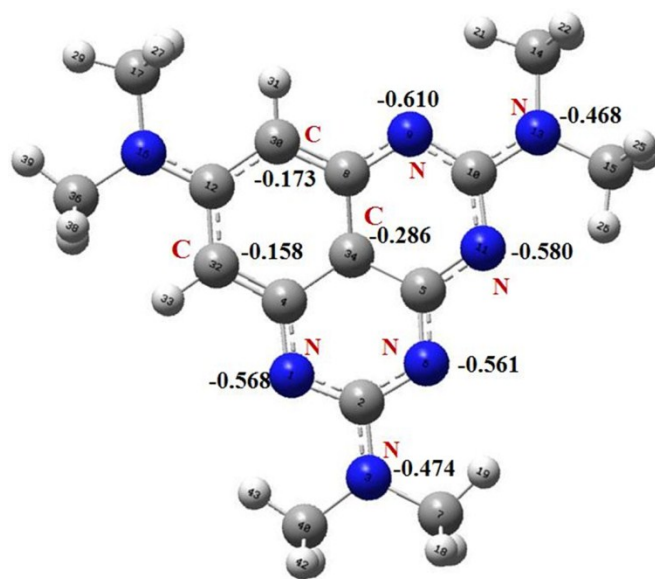

BD-CN

**Figure S8** NBO analysis for carbon nitride polymer samples.

**Table S2** Charge and structural parameters of polymer substrates with adsorbed water molecules

| Sample                | $D_{\text{ads}}$ (Å) | DE (eV) | $l(\text{O-H}_a)$ (Å) | $l(\text{O-H}_b)$ (Å) | $\angle\text{H-O-H}$ $\theta^\circ$ | Natural bond orbital charge ( $q$ ) |        |              |        |
|-----------------------|----------------------|---------|-----------------------|-----------------------|-------------------------------------|-------------------------------------|--------|--------------|--------|
|                       |                      |         |                       |                       |                                     | $\text{H}_a$                        | O      | $\text{H}_b$ | Total  |
| Pure H <sub>2</sub> O |                      |         | 0.96                  | 0.96                  | 103.72                              | 0.472                               | -0.944 | 0.472        | 0      |
| CN                    | 2.20                 | -0.7867 | 0.97                  | 0.96                  | 101.96                              | 0.500                               | -0.975 | 0.469        | -0.006 |
| PD-CN                 | 2.16                 | -0.7640 | 0.97                  | 0.97                  | 101.79                              | 0.503                               | -0.977 | 0.469        | -0.005 |
| BD-CN                 | 2.11                 | -0.7915 | 0.97                  | 0.97                  | 101.45                              | 0.500                               | -0.979 | 0.468        | -0.011 |

$D_{\text{ads}}$  = adsorption distance,  $l$  = bond length,  $\theta^\circ$  = bond angle,  $q$  = NBO charge



| Active sites | H <sub>2</sub> O adsorption                                                          | $\Delta E$ (eV) |
|--------------|--------------------------------------------------------------------------------------|-----------------|
| N-32         | 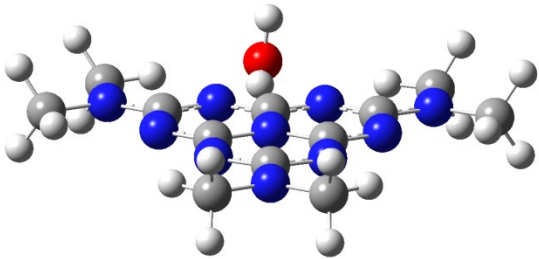   | -0.7867         |
| C-11         |    | -0.7863         |
| C-3          |   | -0.7856         |
| N-12         |  | -0.7860         |
| N-8          |  | -0.7859         |

**Table S3** Active sites in CN sample for H<sub>2</sub>O adsorption and their binding energy values

| Active sites | H <sub>2</sub> O adsorption | $\Delta E$ (eV) |
|--------------|-----------------------------|-----------------|
| C-32         |                             | -0.7640         |
| C-9          |                             | -0.7638         |
| C-14         |                             | -0.7634         |
| N-1          |                             | -0.7635         |
| C-4          |                             | -0.6773         |

**Table S4** Active sites in PD-CN sample for H<sub>2</sub>O adsorption and their binding energy values

| Active sites | H <sub>2</sub> O adsorption                                                          | $\Delta E$ (eV) |
|--------------|--------------------------------------------------------------------------------------|-----------------|
| C-32         | 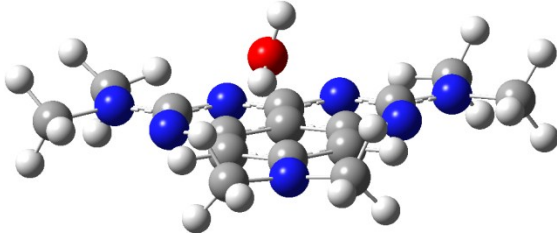   | -0.7915         |
| C-34         |    | -0.7911         |
| C-4          |   | -0.7905         |
| N-11         |  | -0.7912         |
| C-30         |  | -0.5877         |

**Table S5** Active sites in BD-CN sample for H<sub>2</sub>O adsorption and their binding energy values

| Sample | Reaction Intermediates | Molecule                                                                             | G+ZPC        |
|--------|------------------------|--------------------------------------------------------------------------------------|--------------|
| CN     | M-OH                   | 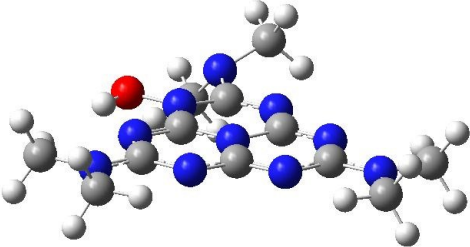   | -29451.35 eV |
|        | M-O                    |   | -29436.61 eV |
|        | M-OOH                  |  | -31482.71 eV |

**Table S6** Adsorption energy values of reaction intermediates on CN polymer substrate

| Sample | Reaction Intermediates | Molecule                                                                             | G+ZPC        |
|--------|------------------------|--------------------------------------------------------------------------------------|--------------|
|        | M-OH                   | 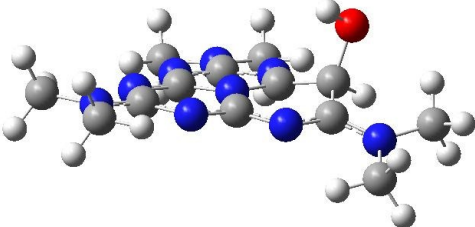   | -29019.19 eV |
| PD-CN  | M-O                    |   | -29002.71 eV |
|        | M-OOH                  |  | -31047.59 eV |

**Table S7** Adsorption energy values of reaction intermediates on PD-CN polymer substrate

| Sample | Reaction Intermediates | Molecule                                                                            | G+ZPC        |
|--------|------------------------|-------------------------------------------------------------------------------------|--------------|
| BD-CN  | M-OH                   | 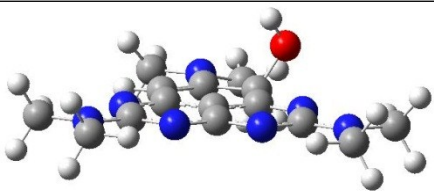  | -28136.51 eV |
|        | M-O                    |   | -28120.73 eV |
|        | M-OOH                  |  | -30164.69 eV |

**Table S8** Adsorption energy values of reaction intermediates on BD-CN polymer substrate

| Sample | Molecule                                                                             | G+ZPC        |
|--------|--------------------------------------------------------------------------------------|--------------|
| CN     | 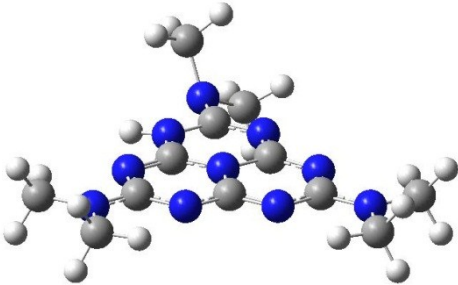   | -27422.39 eV |
| PD-CN  |   | -26987.74 eV |
| BD-CN  |  | -26106.15 eV |

**Table S9** Adsorption energy values of reaction intermediates (M-H\*) on carbon nitride polymer substrates
